# Supplementary material for: Imaging of carotid artery inflammatory plaques with superparamagnetic nanoparticles and an external magnet collar
Source: Royal Society of Chemistry journal article supplement (doi:10.1039/c6tb02849g), 2016-12-21
Supplement: c6tb02849g1.pdf [file c6tb02849g1.pdf]

*Supporting Information*

## **Imaging of Carotid Artery Inflammatory Plaques with Superparamagnetic Nanoparticles and an External Magnet Collar**

5 Yimin Shi.<sup>a, c</sup>, Yongping Gao.<sup>b</sup>, Liang Chen.<sup>a, c, \*</sup> and Yongsheng Li<sup>b, \*</sup>.

<sup>a</sup> Department of Neurosurgery, Huashan Hospital, Fudan University, Shanghai 200040, China. P.R.

<sup>b</sup> Lab of Low-Dimensional Materials Chemistry, Key Laboratory for Ultrafine Materials of Ministry of Education, School of Materials Science and Engineering, East

10 China University of Science and Technology, Shanghai 200237, China. P.R.

<sup>c</sup> State Key Laboratory of Medical Neurobiology, School of Basic Medical Sciences and Institutes of Brain Science, Fudan University, Shanghai 200040, China. P.R.

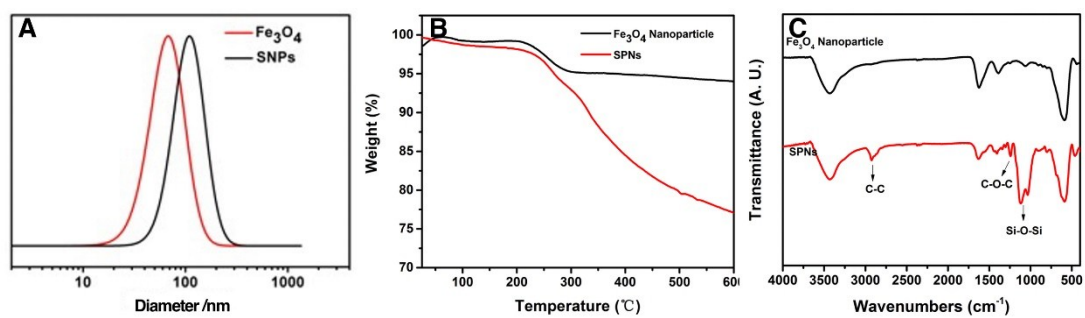

**Figure S1.** Diameter distribution curves of Fe<sub>3</sub>O<sub>4</sub> nanoparticles and SNPs in water measured by dynamic light scattering technique (A). The thermogravimetric (TG) analysis (B) and the Fourier transform infrared spectrometer (FT-IR) (C) result of the SNPs, as compared with the 5 Fe<sub>3</sub>O<sub>4</sub> nanoparticles.

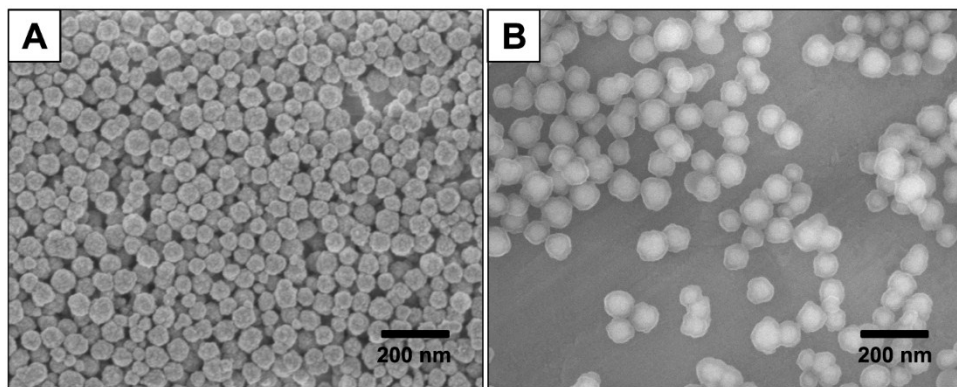

**Figure S2.** Scanning Electron Microscope (SEM) images of (A)  $\text{Fe}_3\text{O}_4$  nanoparticles and (B) SNPs

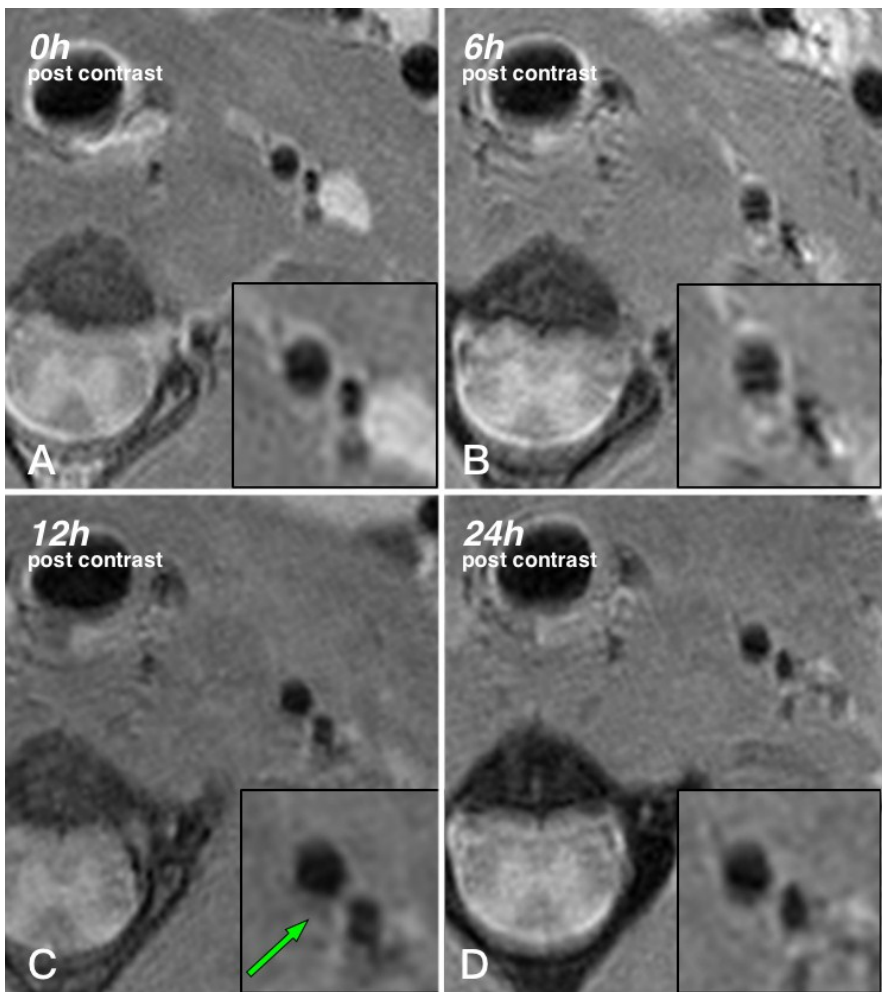

**Figure S3.** (A to D): PD-T2 MRI images taken 0, 6, 12 and 24 hours after the intravenous injection of designed dosage of SNPs solution. The LCCA endothelium of 12-hours' post injection (green arrow in C) presented lower signal intensity than other three time-points.

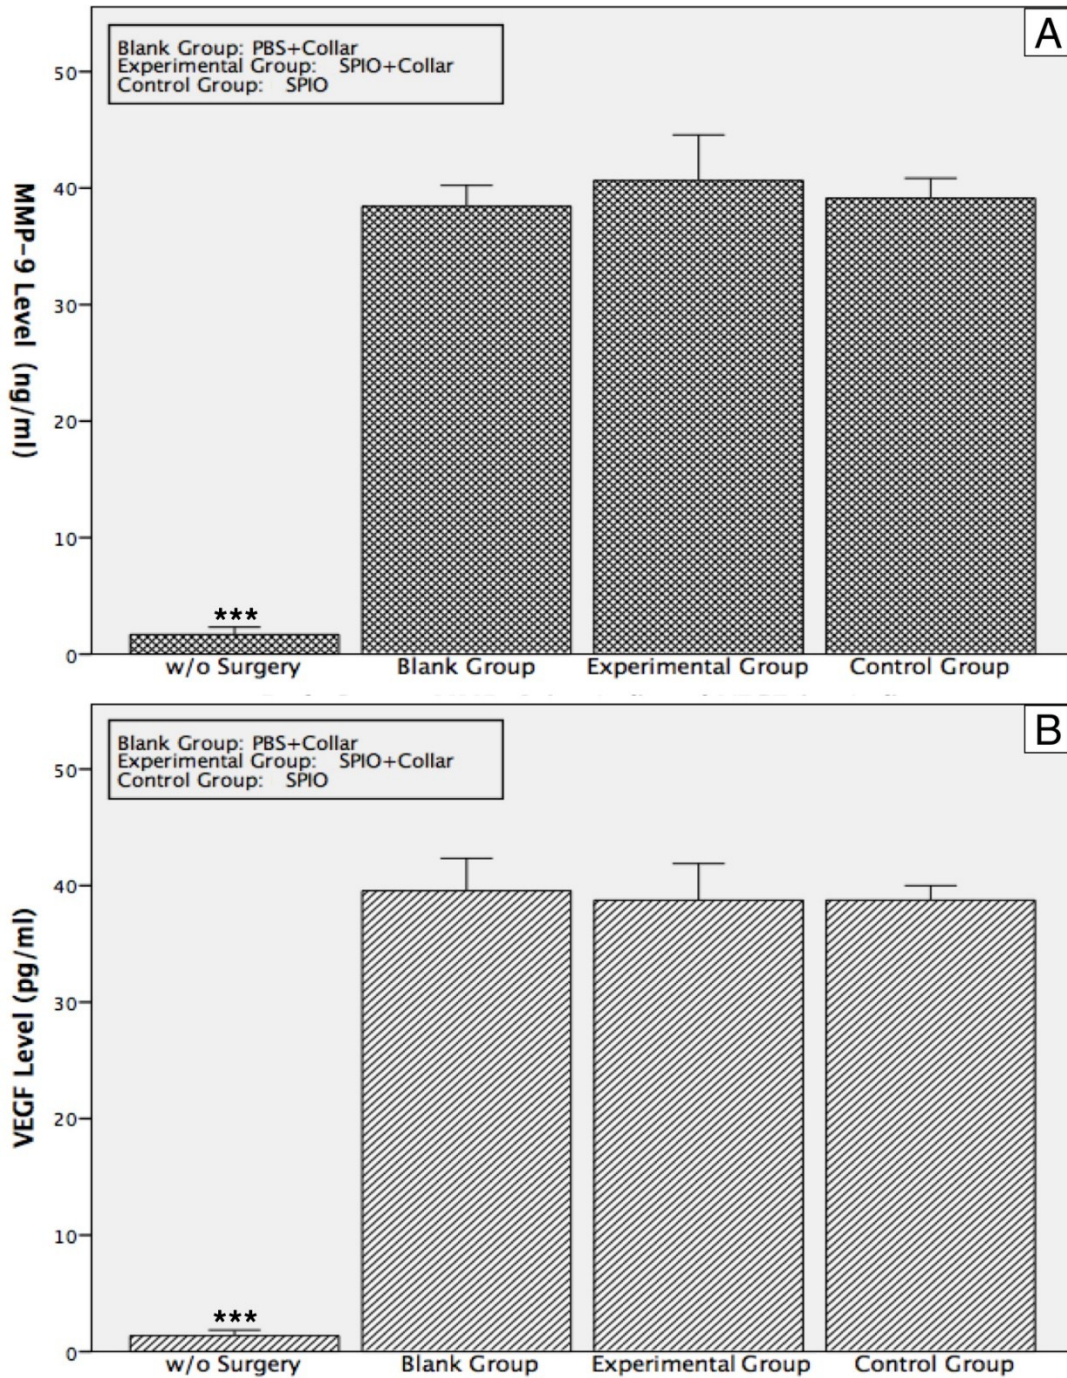

**Figure S4.** The serum MMP-9 (A) and VEGF (B) expression of three surgery groups and one paired group without surgery. Values are means  $\pm$  SD; \*\*\*P<0.001 vs other groups; n=6.
